# Supplementary material for: Evaluation of Sacha Inchi (Plukenetia volubilis L.) By-Products as Valuable and Sustainable Sources of Health Benefits
Source: MDPI journal article supplement (doi:10.3390/horticulturae8040344), 2022-04-17
Supplement: s1 [file s1]

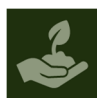

## Supplementary materials

# Evaluation of Sacha Inchi (*Plukenetia volubilis* L.) By-products as Valuable and Sustainable Sources of Health Benefits

Suwapat Kittibunchakul <sup>1</sup>, Chatrapa Hudthagosol <sup>2</sup>, Promluck Somboonpanyakul <sup>2</sup>, Suwimol Sapwarobol <sup>3</sup>, Piya Temviriyankul <sup>1</sup> and Uthaiwan Suttisansanee <sup>1,\*</sup>

1 Food and Nutrition Academic and Research Cluster, Institute of Nutrition, Mahidol University, Salaya, Phuttamonthon, Nakhon Pathom 73170, Thailand; suwapat.kit@mahidol.ac.th (S.K.); piya.tem@mahidol.ac.th (P.T.)

2 Faculty of Public Health, Mahidol University, Ratchathewi, Bangkok 10400, Thailand; chatrapa.hud@mahidol.ac.th (C.H.); promluck.san@mahidol.ac.th (P.S.)

3 Faculty of Allied Health Sciences, Chulalongkorn University, Pathumwan, Bangkok 10330, Thailand; suwimol.sa@chula.ac.th (S.S.)

\* Correspondence: uthaiwan.sut@mahidol.ac.th; Tel.: +66-(0)-2800-2380 (ext. 422)

## Supplementary Figure S1:

High-performance liquid chromatograms of phenolics in (A) husk and (B) shell of sachu inchi.

(a)

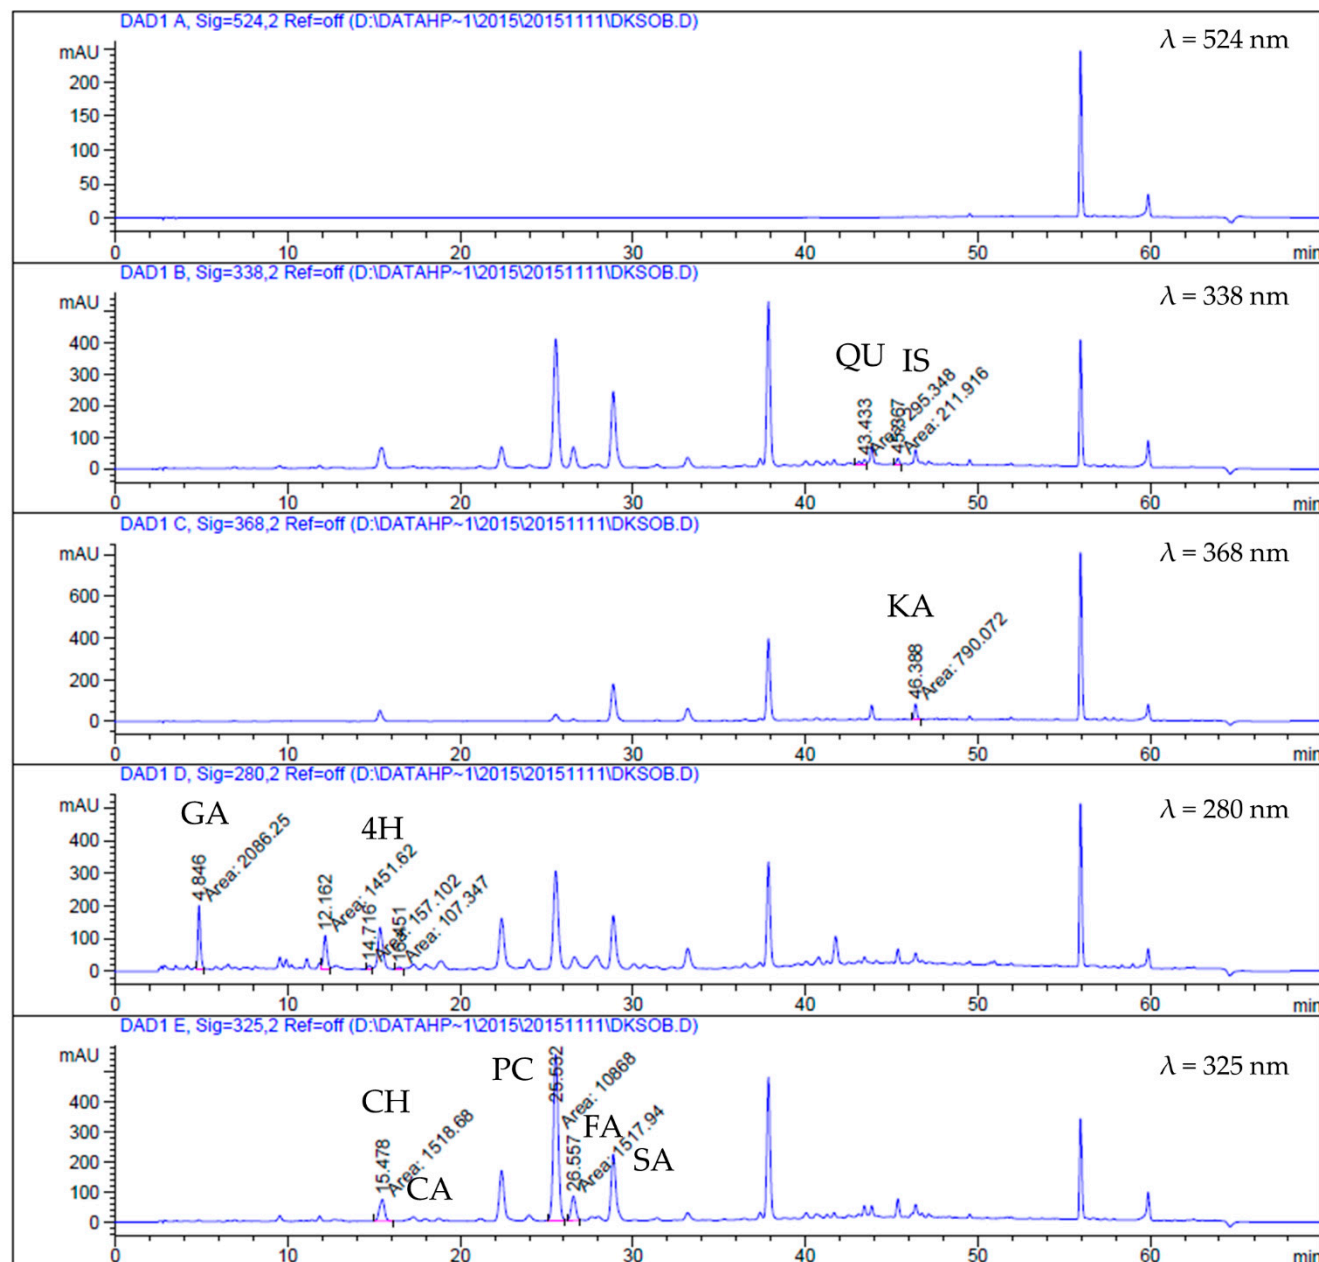

Note: QU = quercetin; IS = isorhamnetin; KA = kaempferol; GA = gallic acid; 4H = 4-hydroxybenzoic acid; CH = chlorogenic acid; CA = caffeic acid; PC = *p*-coumaric acid; FA = ferrulic acid; SA = sinapic acid

## Supplementary Figure S1 (Cont.):

High-performance liquid chromatograms of phenolics in (A) husk and (B) shell of sachu inchi.

(b)

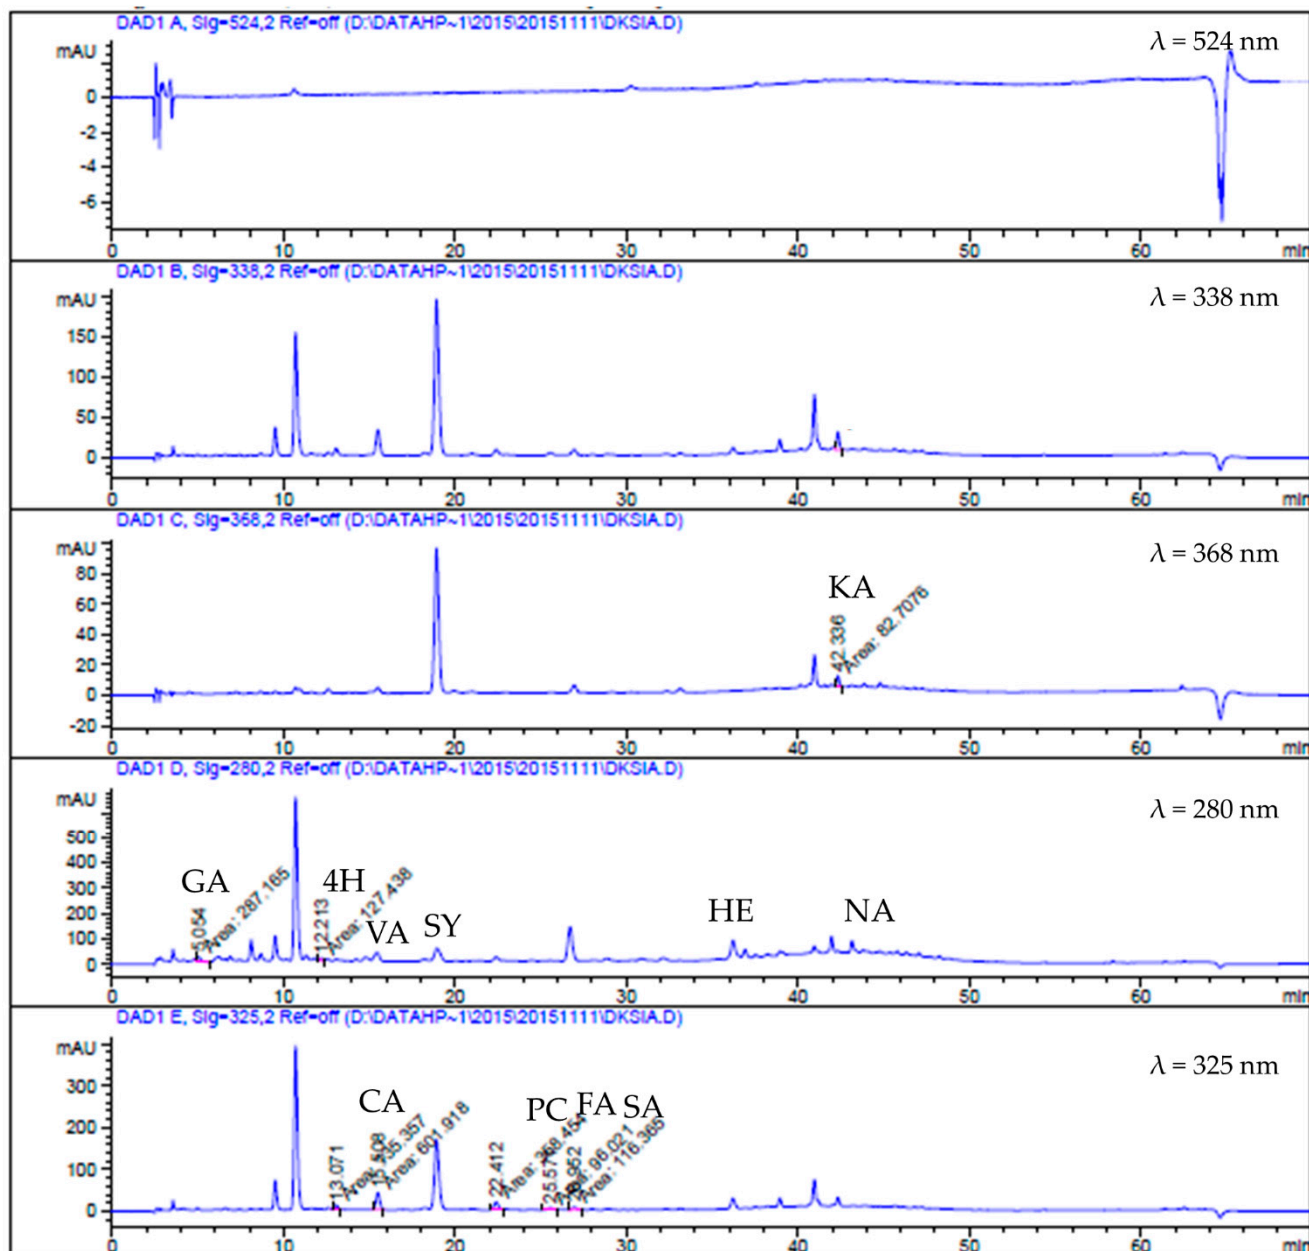

Note: KA = kaempferol; HE = hesperidin; NA = naringenin; GA = gallic acid; 4H = 4-hydroxybenzoic acid; VA = vallinic acid; SY = syringic acid; CA = caffeic acid; PC = *p*-coumaric acid; FA = ferrulic acid; SA = sinapic acid
